# Supplementary material for: Zinc shapes the folding landscape of p53 and establishes a pathway for reactivating structurally diverse cancer mutants
Source: eLife journal article supplement (doi:10.7554/elife.61487), 2020-12-02
Supplement: supp [file elife-61487-supp-v1.zip]

Archive with 13 entries (13 files):
- elife_poa_e61487_Figure_2_figure_supplement_1.pdf
- elife_poa_e61487_Figure_3_figure_supplement_1.pdf
- elife_poa_e61487_Figure_3_figure_supplement_2.pdf
- elife_poa_e61487_Figure_3_source_data_1.docx
- elife_poa_e61487_Figure_4_figure_supplement_1.pdf
- elife_poa_e61487_Figure_4_source_data_1.docx
- elife_poa_e61487_Figure_5_figure_supplement_1.pdf
- elife_poa_e61487_Figure_5_figure_supplement_2.pdf
- elife_poa_e61487_Figure_8_figure_supplement_1.pdf
- elife_poa_e61487_Figure_9_figure_supplement_1.pdf
- elife_poa_e61487_Supplementary_file_1.docx
- elife_poa_e61487_Transparent_Reporting_File.pdf
- elife_poa_e61487_Supplementary_File_2.docx
