# Supplementary material for: Zinc shapes the folding landscape of p53 and establishes a pathway for reactivating structurally diverse cancer mutants
Source: eLife journal article supplement (doi:10.7554/elife.61487), 2020-12-02
Supplement: supp [file elife-61487-supp-v1.zip › elife_poa_e61487_Figure_3_source_data_1.docx]

| **Mutant** | **ΔGapo (kcal mol-1)** | **KZn (M)** | **KZn (direct) (M)** |
| --- | --- | --- | --- |
| WT | 6.3 ± 0.1 | 7 ± 2 x 10-15 | 1.7 ± 0.7 x 10-15 |
| **Zinc binding class** | | | |
| C176S | 5.9 ± 0.1 |  | 2.7 ± 0.8 x 10-10 |
| R175H | 6.3 ± 0.2 |  | 5.2 ± 1.8 x 10-11 |
| C242S | 5.8 ± 0.1 |  | 2.1 ± 0.6 x 10-12 |
| L194F | 7.17 ± 0.06 | 5.0 ± 1.9 x 10-14 |  |
| R249S | 6.0 ± 0.1 | 3.3 ± 1.8 x 10-13 |  |
| H179R | 6.3 ± 0.1 |  | 1.1 ± 0.5 x 10-13 |
| P152L | 6.2 ± 0.3 | 5.4 ± 6.6 x 10-14 |  |
| R282Q | 5.8 ± 0.2 | 3.3 ± 1.9 x 10-14 |  |
| S241F | 5.8 ± 0.2 | 3.1 ± 1.7 x 10-14 |  |
| **Stability class** | | | |
| E285K | 1.7 ± 0.1 | 1.0 ± 0.3 x 10-14 |  |
| Y234C | 3.3 ± 0.1 |  | 1.9 ± 0.2 x 10-15 |
| Y220C | 4.2 ± 0.1 | * |  |
| Y205C | 3.4 ± 0.1 | * |  |
| Y163C | 4.9 ± 0.2 | * |  |
| V272M | 4.30 ± 0.06 | 2.3 ± 0.4 x 10-15 |  |
| A138V | 3.33 ± 0.05 | 1.0 ± 0.2 x 10-14 |  |
| G245S | 5.3 ± 0.1 | 3.5 ± 1.7 x 10-14 | 7.1 ± 2.5 x 10-15 |
| **Mixed zinc binding/stability class** | | | |
| V157F | 3.4 ± 0.2 | 9.5 ± 8.5 x 10-14 |  |
| R158H | 5.0 ± 0.2 | 5.1 ± 3.6 x 10-14 |  |
| M237I | 5.2 ± 0.2 |  | 3.3 ± 1.5 x 10-13 |
| **DNA binding class** | | | |
| R248Q | 7.6 ± 0.5 | 6.5 ± 9 x 10-15 | 1.0 ± 0.2 x 10-15 |
| R273H | 7.3 ± 0.2 | 1.4 ± 0.9 x 10-14 |  |
| R280K | 7.89 ± 0.08 | 1.6 ± 0.9 x 10-14 |  |
