# Supplementary material for: Zinc shapes the folding landscape of p53 and establishes a pathway for reactivating structurally diverse cancer mutants
Source: eLife journal article supplement (doi:10.7554/elife.61487), 2020-12-02
Supplement: supp [file elife-61487-supp-v1.zip › elife_poa_e61487_Figure_4_source_data_1.docx]

| **DBD variant (n)** | **waf1 5' (2.6)** | **gadd45 (2.0)** | **puma**  **(2.4)** | **type IV collagenase (2.5)** | **p53rfp**  **(2.2)** | **mdm2**  **(2.0)** | **bax**  **(1.2)** | **rgc**  **(1.0)** | **waf1 3'**  **(nd)** | **EGFR**  **(nd)** |
| --- | --- | --- | --- | --- | --- | --- | --- | --- | --- | --- |
| wt (3) | 0.82 ± 0.07 | 1.1 ± 0.2 | 1.8 ± 0.2 | 2.1 ± 0.3 | 5.0 ± 0.4 | 5.5 ± 1.2 | 12 ± 3 | 13 ± 2 | >25 | >25 |
| e285k (3) | 0.24 ± 0.02 | 0.26 ± 0.05 | 0.34 ± 0.10 | 0.31 ± 0.08 | 0.42 ± 0.12 | 0.21 ± 0.05 | 0.59 ± 0.27 | 0.72 ± 0.30 | >25 | >25 |
| v272m (4) | 0.50 ± 0.06 | 0.80 ± 0.11 | 1.0 ± 0.1 | 1.1 ± 0.1 | 2.0 ± 0.4 | 1.8 ± 0.2 | 9.4 ± 1.1 | 7.0 ± 2.1 | >25 | >25 |
| y234c (3) | 0.46 ± 0.09 | 0.75 ± 0.15 | 1.0 ± 0.1 | 1.2 ± 0.1 | 2.4 ± 0.5 | 2.0 ± 0.3 | 13 ± 3 | 11 ± 4 | >25 | >25 |
| r158h (2) | 0.82 ± 0.16 | 0.94 ± 0.17 | 1.7 ± 0.4 | 2.1 ± 0.6 | 4.4 ± 0.9 | 4.8 ± 1.7 | 12 ± 1 | 7.1 ± 1.6 | >25 | >25 |
| y205c (3) | 0.57 ± 0.12 | 0.88 ± 0.12 | 1.2 ± 0.3 | 1.6 ± 0.3 | 4.1 ± 0.8 | 3.4 ± 1.1 | 15 ± 5 | 7.7 ± 2.1 | >25 | >25 |
| r282q (3) | 0.98 ± 0.16 | 1.4 ± 0.2 | 2.0 ± 0.3 | 2.6 ± 0.3 | 4.0 ± 0.5 | 4.0 ± 0.6 | 12 ± 2 | 13 ± 3 | >25 | >25 |
| v157f (3) | 1.7 ± 1.2 | 2.6 ± 1.7 | 4.1 ± 2.8 | 6.4 ± 4.6 | 8.7 ± 4.7 | 9.2 ± 4.2 | 17 ± 4 | 20 ± 5 | >25 | >25 |
| m237i (3) | 0.83 ± 0.15 | 2.0 ± 0.4 | 2.3 ± 0.4 | 3.0 ± 0.6 | 8.1 ± 1.3 | 7.0 ± 3.7 | >25 | >25 | >25 | >25 |
| y220c (2) | 0.73 ± 0.05 | 1.4 ± 0.1 | 2.4 ± 0.1 | 3.0 ± 0.1 | >25 | >25 | >25 | >25 | >25 | >25 |
| g245sa (4) | 14 ± 6 | 14 ± 11 | 14 ± 11 | 15 ± 10 | 14 ± 11 | 14 ± 11 | 15 ± 10 | 16 ± 9 | >25 | >25 |
| l194f (3) | 3.8 ± 0.2 | 5.8 ± 0.3 | 9.9 ± 0.8 | 14 ± 1 | 24 ± 1 | 23 ± 2 | >25 | >25 | >25 | >25 |
| p152l (4) | 0.79 ± 0.05 | 1.4 ± 0.2 | >25 | >25 | >25 | >25 | >25 | 17 ± 5 | >25 | >25 |
| r273h (2) | >25 | >25 | >25 | >25 | >25 | >25 | >25 | >25 | >25 | >25 |
| r280k (2) | >25 | >25 | >25 | >25 | >25 | >25 | >25 | >25 | >25 | >25 |
| r175h (2) | >25 | >25 | >25 | >25 | >25 | >25 | >25 | >25 | >25 | >25 |
| c242s (2) | >25 | >25 | >25 | >25 | >25 | >25 | >25 | >25 | >25 | >25 |
| s241f (2) | >25 | >25 | >25 | >25 | >25 | >25 | >25 | >25 | >25 | >25 |
| h179r (2) | >25 | >25 | >25 | >25 | >25 | >25 | >25 | >25 | >25 | >25 |
| y163c (2) | >25 | >25 | >25 | >25 | >25 | >25 | >25 | >25 | >25 | >25 |
| r249s (2) | >25 | >25 | >25 | >25 | >25 | >25 | >25 | >25 | >25 | >25 |
| r248q (2) | >25 | >25 | >25 | >25 | >25 | >25 | >25 | >25 | >25 | >25 |
| c176s (2) | >25 | >25 | >25 | >25 | >25 | >25 | >25 | >25 | >25 | >25 |
