# Supplementary figures and images for: Zinc shapes the folding landscape of p53 and establishes a pathway for reactivating structurally diverse cancer mutants
Source: eLife journal article supplement (doi:10.7554/elife.61487), 2020-12-02

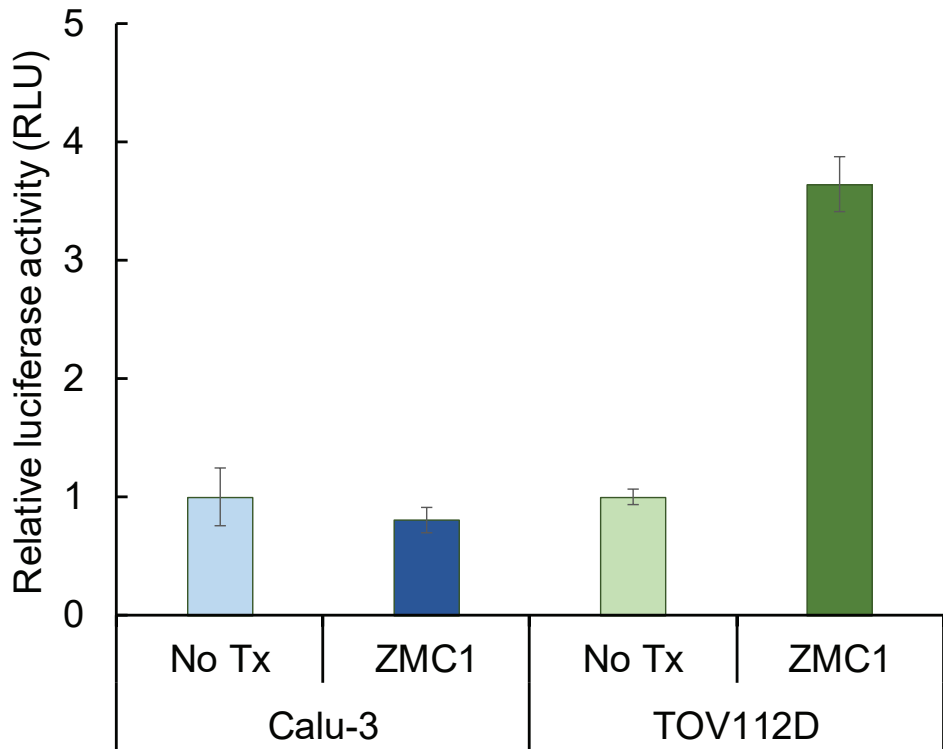

Supplement: supp [file elife-61487-supp-v1.zip]

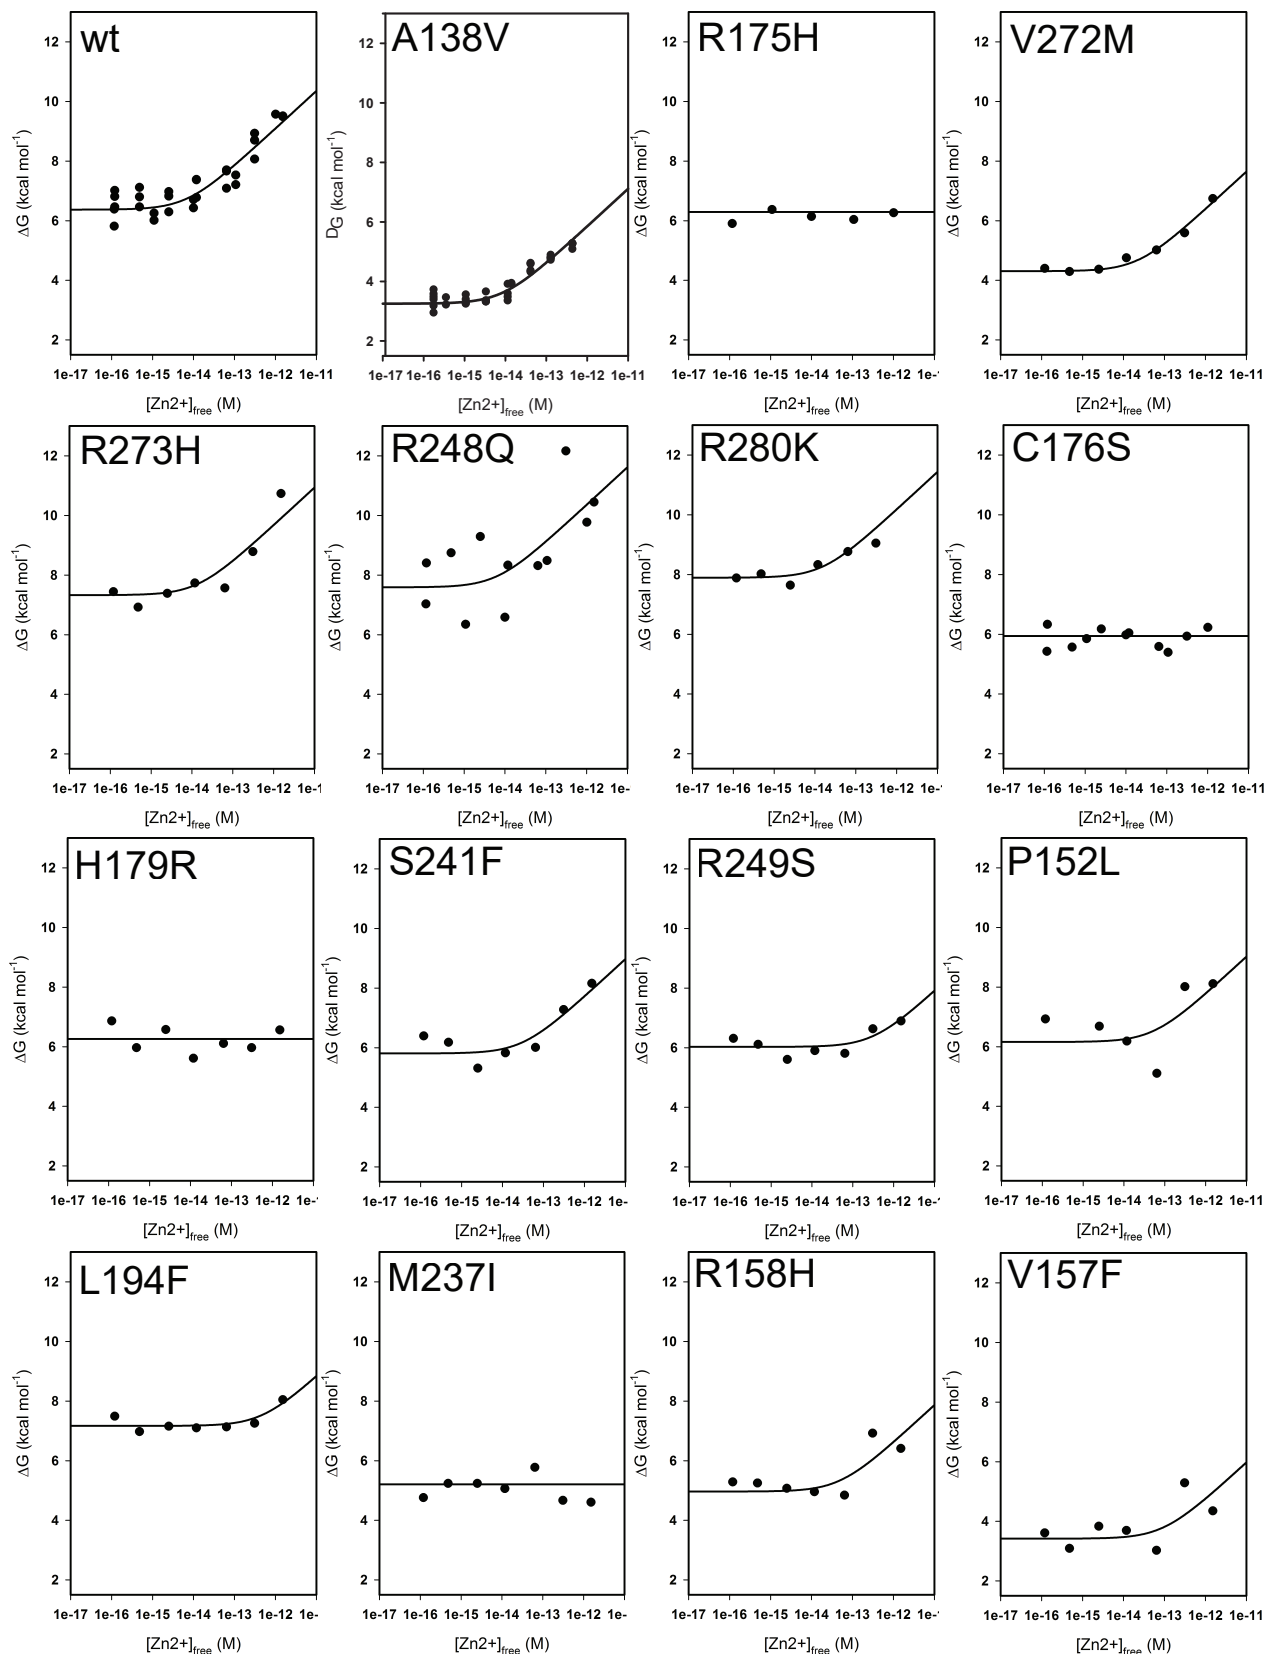

Supplement: supp [file elife-61487-supp-v1.zip]

**A**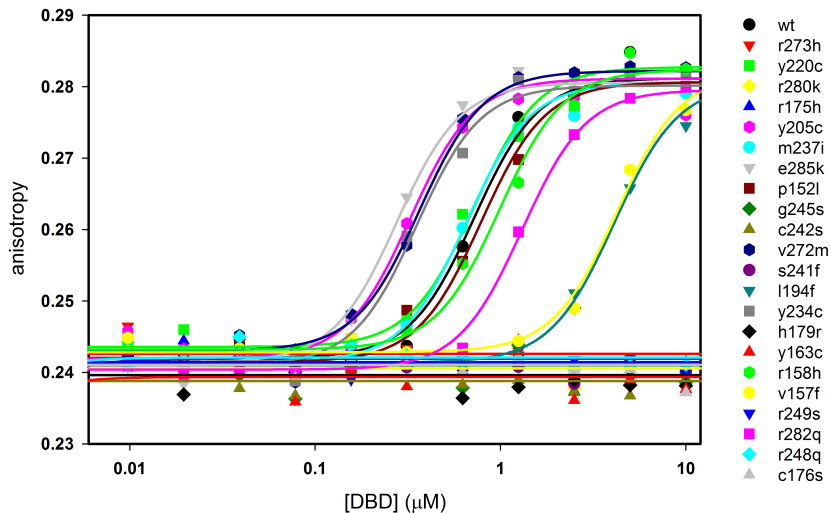**B**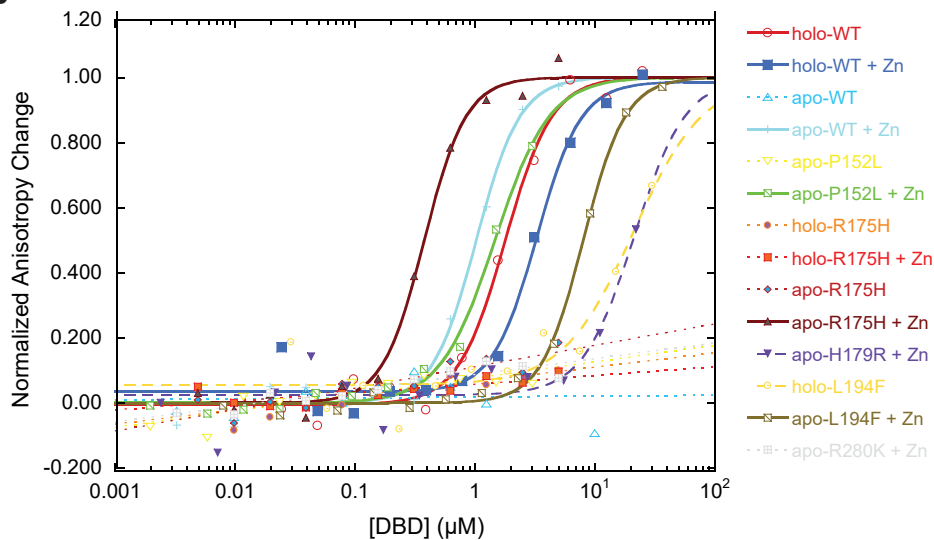

Supplement: supp [file elife-61487-supp-v1.zip]

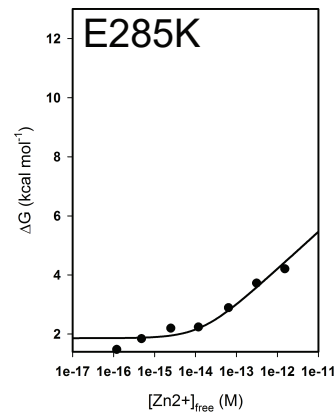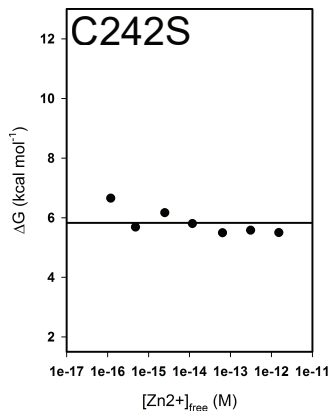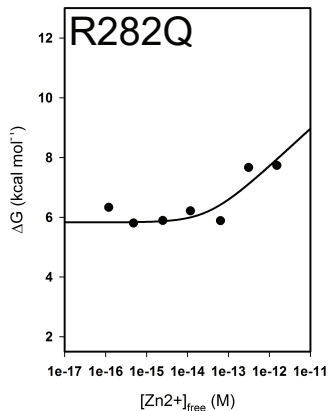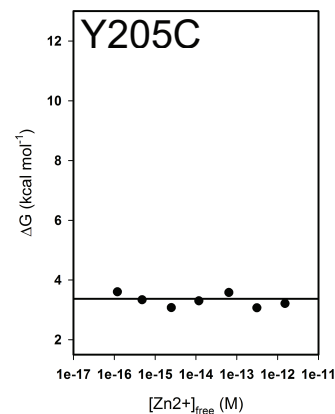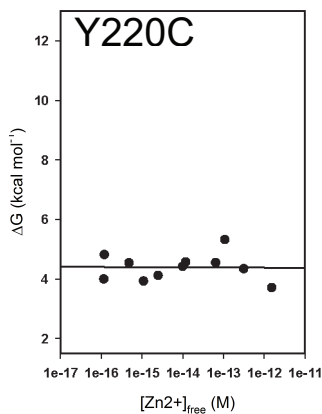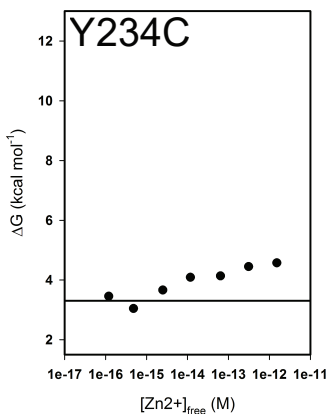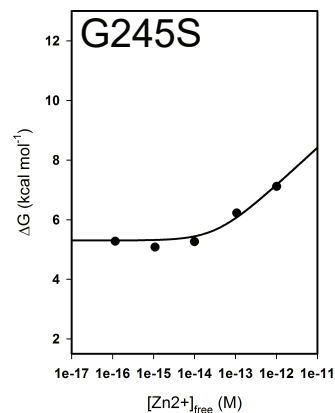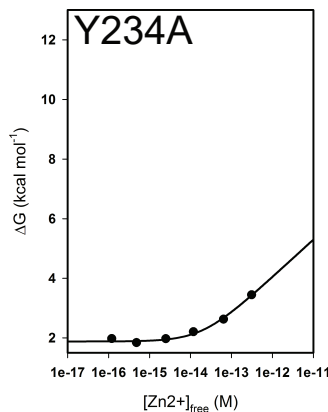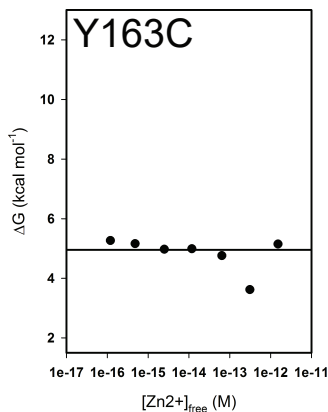

Supplement: supp [file elife-61487-supp-v1.zip]

**A**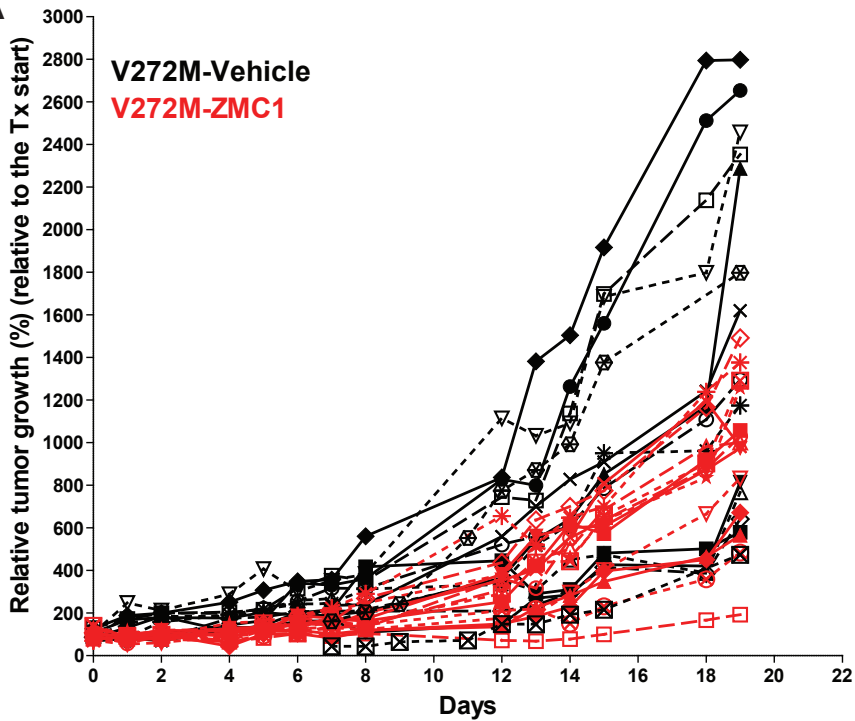**B**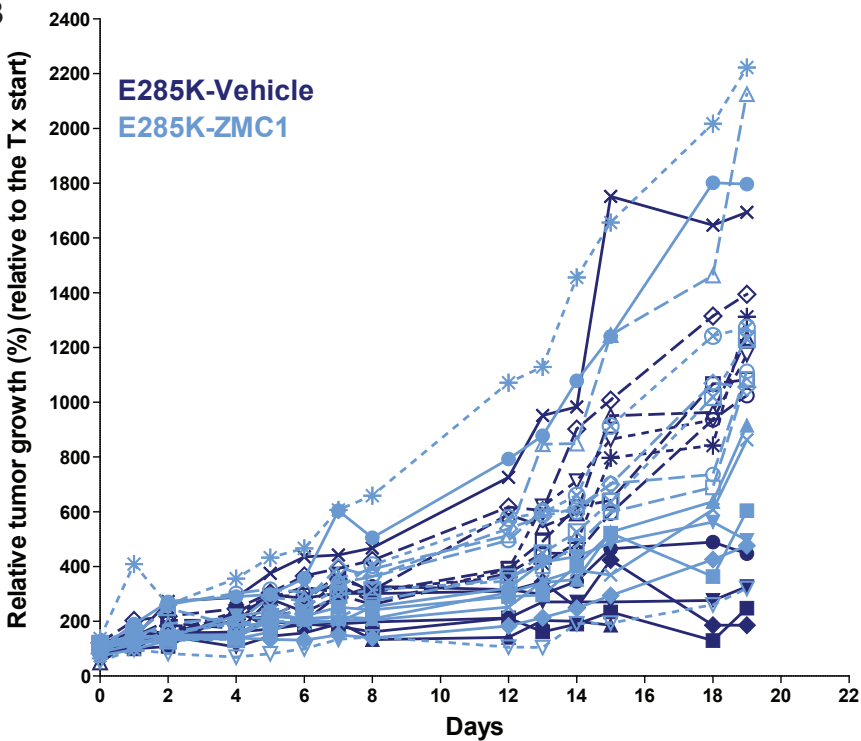

Supplement: supp [file elife-61487-supp-v1.zip]

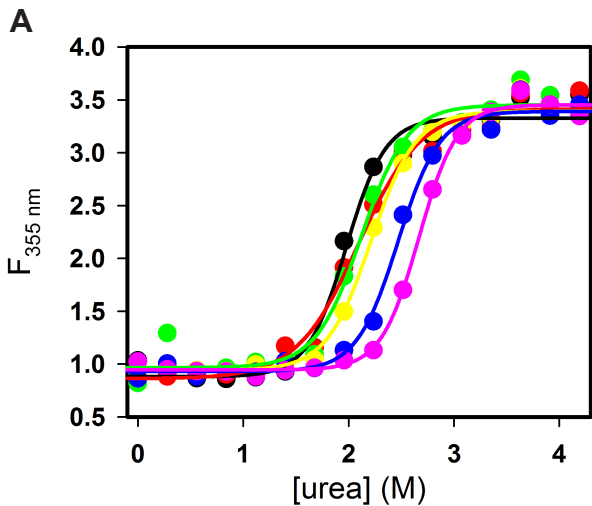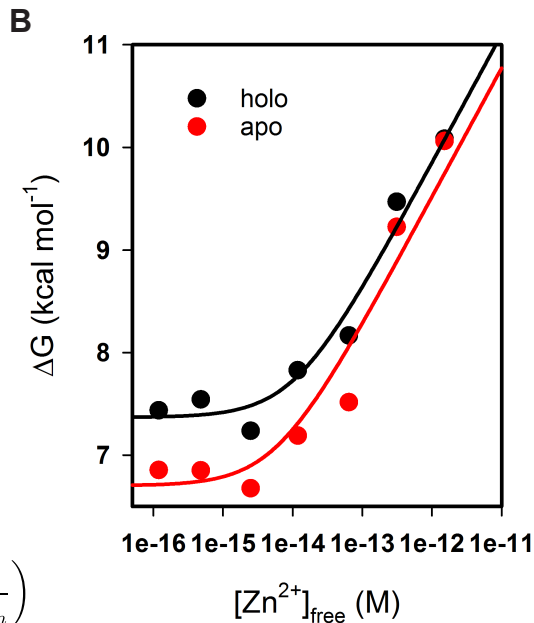

**C**

$$\Delta G_u(T) = \Delta H \left( 1 - \frac{T}{T_m} \right) - \Delta C_p \left( T_m - T + T \cdot \ln \frac{T}{T_m} \right)$$

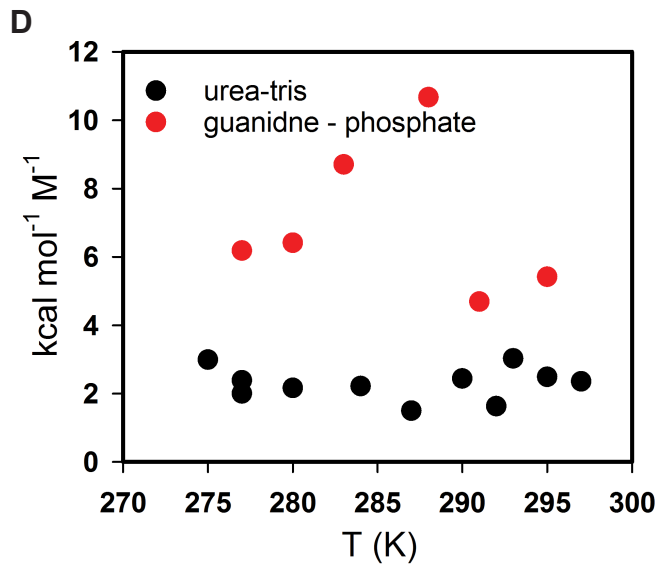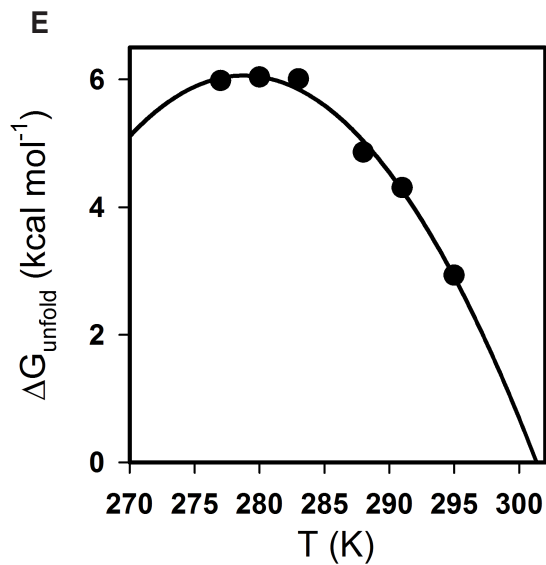

Supplement: supp [file elife-61487-supp-v1.zip]

ZMC1

(1  $\mu$ M, 4hrs)

IP: PAB240

WB: p53  
(DO-1)

Input: p53  
actin

V138, 37°C

-

+

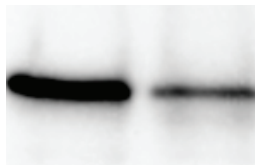

1

0.52

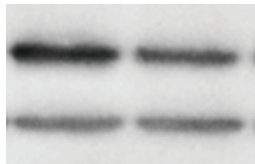

Supplement: supp [file elife-61487-supp-v1.zip]

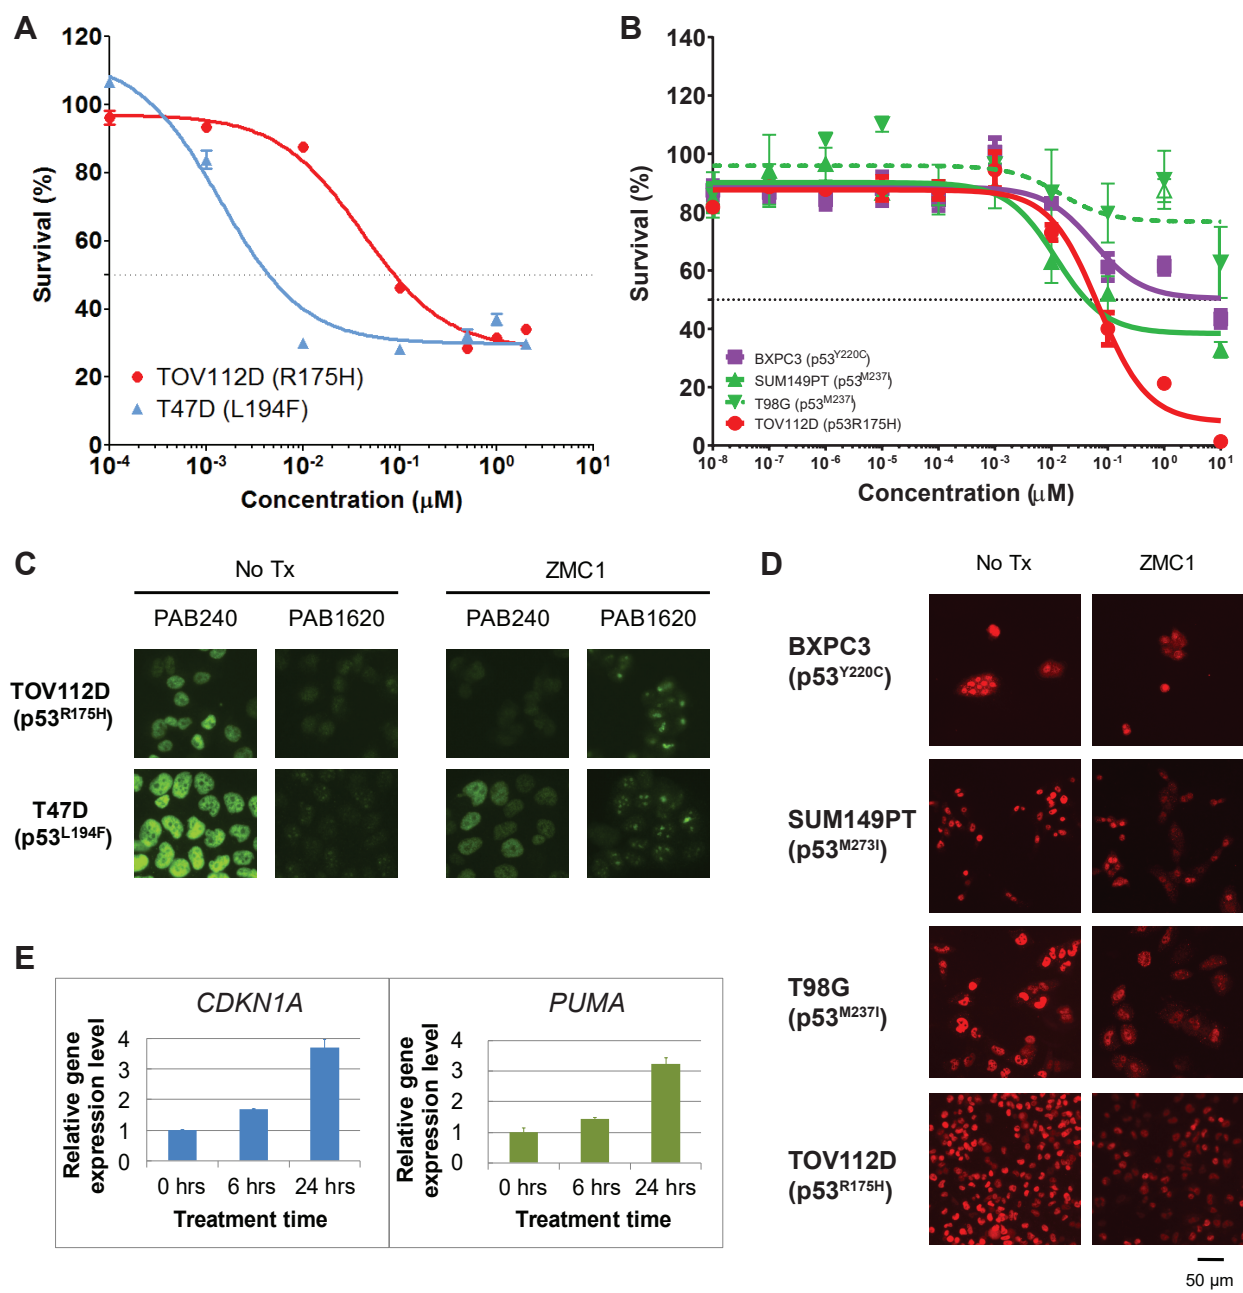

Supplement: supp [file elife-61487-supp-v1.zip]
